# Supplementary material for: The Association between Body Mass Index and Hot Flash in Midlife Women: A Meta-analysis
Source: PubMed Central journal article supplement — J Menopausal Med. 2016 Apr 26;22(1):14–9. doi: 10.6118/jmm.2016.22.1.14 (PMC4854655; doi:10.6118/jmm.2016.22.1.14), 2016-04-26
Supplement: jmm-22-14-s001.pdf [file jmm-22-14-s001.pdf]

**Supplementary Table S1.** Quality assessment of studies addressing the association between body mass index and cervical cancer risk

| Quality assessment |                     |                         |                          |                         |                        |                             |                       |                       |                          |                      |             |
|--------------------|---------------------|-------------------------|--------------------------|-------------------------|------------------------|-----------------------------|-----------------------|-----------------------|--------------------------|----------------------|-------------|
| Studies            | Design <sup>a</sup> | Limitation <sup>b</sup> | Consistency <sup>c</sup> | Directness <sup>d</sup> | Precision <sup>e</sup> | Reporting bias <sup>f</sup> | Strength <sup>g</sup> | Gradient <sup>h</sup> | Confounding <sup>i</sup> | Quality <sup>j</sup> | Sample size |
| Freeman 2001       | Cohort              | 0                       | 0                        | 0                       | 0                      | 0                           | +1                    | +1                    | 0                        | Moderate             | 375         |
| Whiteman 2003      | Case-control        | 0                       | 0                        | 0                       | 0                      | 0                           | 0                     | +1                    | 0                        | Moderate             | 1060        |
| Gallicchio 2006    | Case-control        | 0                       | 0                        | 0                       | 0                      | 0                           | 0                     | +1                    | 0                        | Moderate             | 611         |
| Miller 2006        | Case-control        | 0                       | 0                        | 0                       | 0                      | 0                           | 0                     | +1                    | +1                       | Moderate             | 609         |
| Schilling 2007     | Case-control        | 0                       | 0                        | 0                       | 0                      | 0                           | +1                    | +1                    | 0                        | Moderate             | 628         |
| Tan 2014           | Cross-sectional     | -1                      | 0                        | 0                       | 0                      | 0                           | 0                     | +1                    | +1                       | Low                  | 305         |
| Gallicchio 2015    | Cohort              | 0                       | 0                        | 0                       | -1                     | 0                           | 0                     | 0                     | 0                        | Low                  | 731         |

<sup>a</sup> Refers to the basic study design, which we have broadly categorized as randomized trials (high), observational (cohort/case-control) studies (low), and other evidence (very low)

<sup>b</sup> Refers to the detailed study methods and execution [serious (-1) or very serious (-2) limitation]

<sup>c</sup> Refers to the similarity of estimates of effect across studies [important inconsistency (-1)]

<sup>d</sup> Refers to the extent to which the 'people', 'interventions', and 'outcome' measures are similar to those of interest [some (-1) or major (-2) uncertainty about directness]

<sup>e</sup> Refers to if sample size <2000 & confidence interval includes 1.0 =-1, otherwise =0]

<sup>f</sup> Refers to the high risk of reporting bias (-1)

<sup>g</sup> Refers to the strong (RR >2 or <0.5) (+1) or very strong (RR >5 or <0.2) (+2) evidence of association with no plausible confounders

<sup>h</sup> Refers to the evidence of a dose response gradient (+1)

<sup>i</sup> Refers to all plausible confounders would have reduced the effect (+1)

<sup>j</sup> Quality: high: if having no negative score with all positive scores; moderate: if having no negative score with at least one positive score; low: if otherwise
