# Supplementary material for: The Association between Body Mass Index and Hot Flash in Midlife Women: A Meta-analysis
Source: PubMed Central journal article supplement — J Menopausal Med. 2016 Apr 26;22(1):14–9. doi: 10.6118/jmm.2016.22.1.14 (PMC4854655; doi:10.6118/jmm.2016.22.1.14), 2016-04-26
Supplement: jmm-22-14-s003.pdf [file jmm-22-14-s003.pdf]

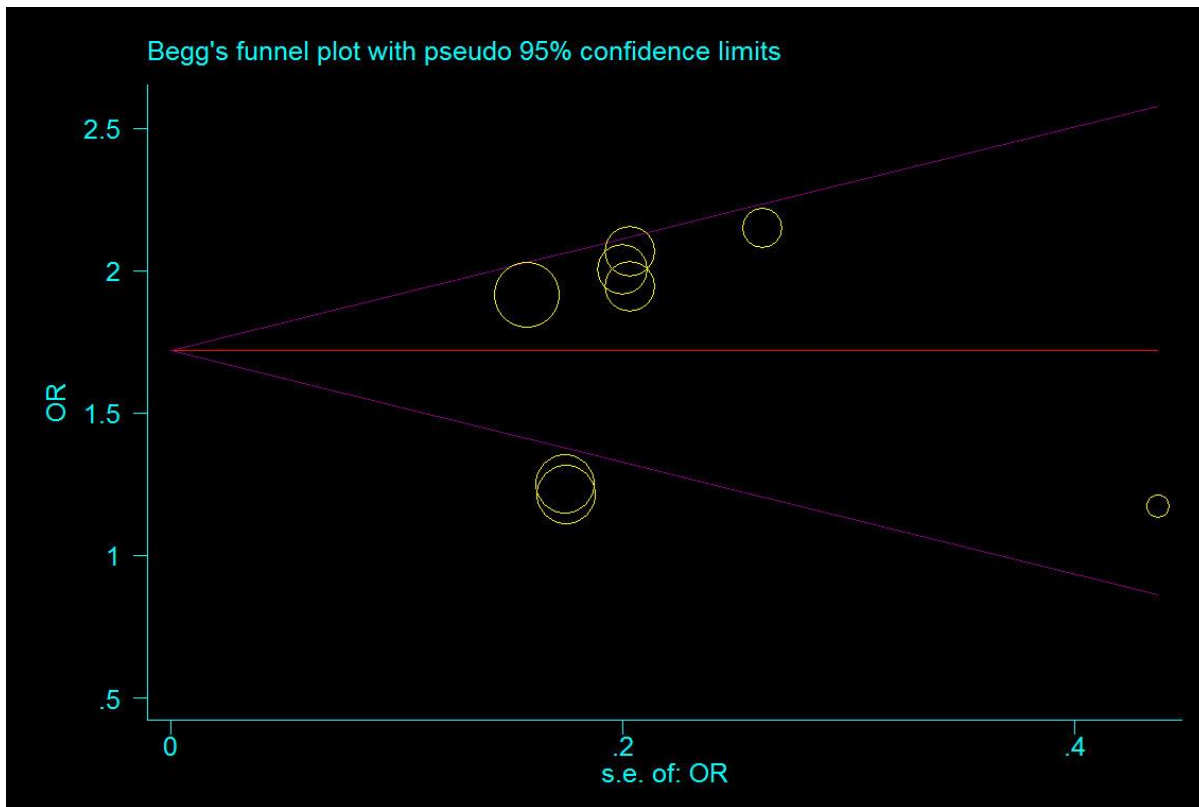

**Supplementary Fig. S2.** Funnel plot of included studies addressing the association between hot flash and obesity. OR: odds ratio.
